# Supplementary material for: Are indigenous territories effective natural climate solutions? A neotropical analysis using matching methods and geographic discontinuity designs
Source: PLOS journal article supplement (doi:10.1371/journal.pone.0245110), 2021-07-12

## S2 Appendix. Covariate balance statistics and falsification tests.

**Fig A. Covariates standard mean differences between ITs, OAs, and PAs with other lands before (Pre-Match) and after matching analysis (Matched) across neotropical countries.**

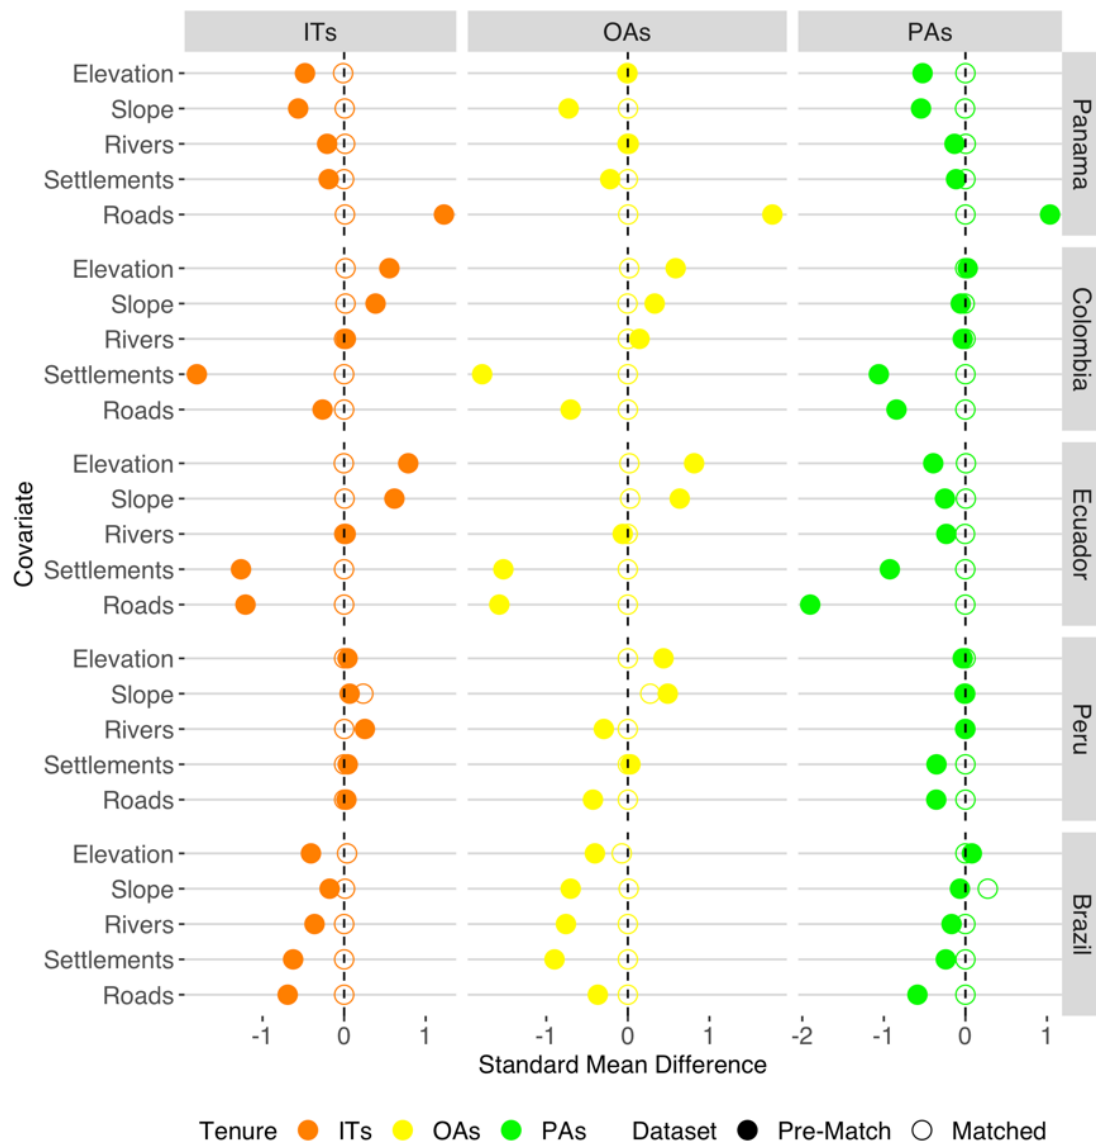

**Fig B. Kolmogorov-Smirnov statistics of covariates between ITs, OAs, and PAs with other lands before (Pre-Match) and after matching analysis (Matched) in neotropical countries.**

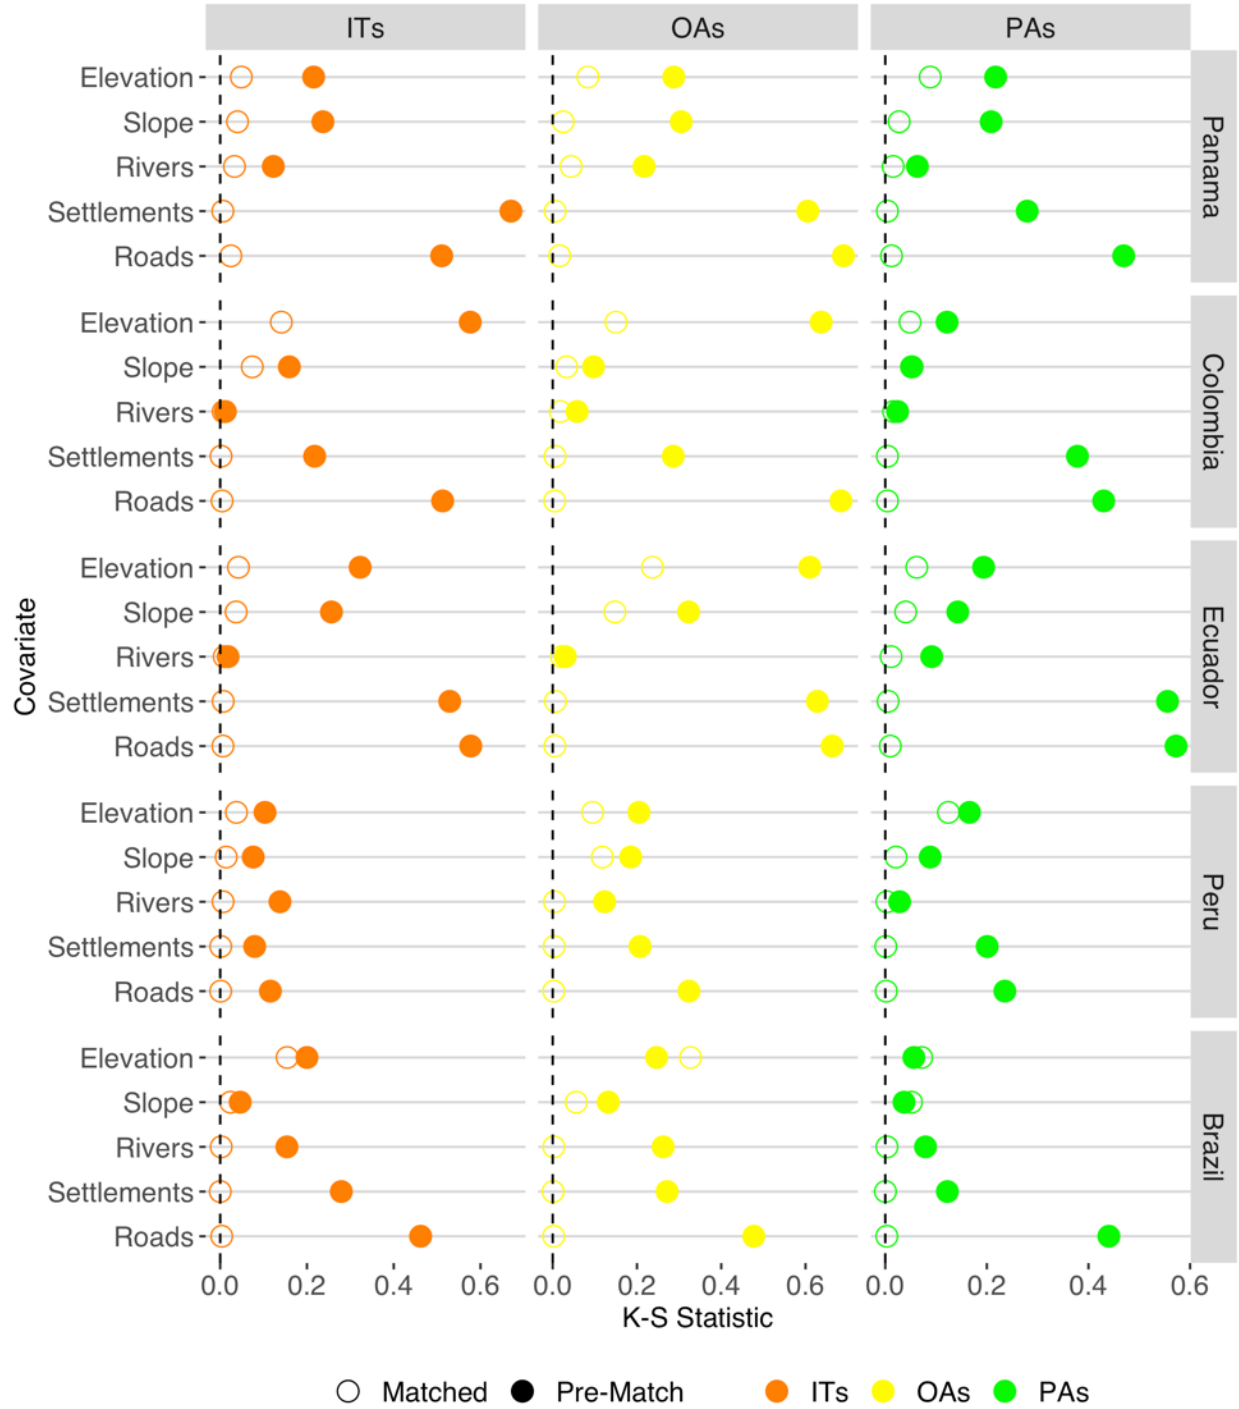

**Fig C. Covariate standard mean differences before (Pre-Match) and after matching (Matched) in geographic discontinuity designs across the boundaries of ITs, OAs and PAs in neotropical countries.**

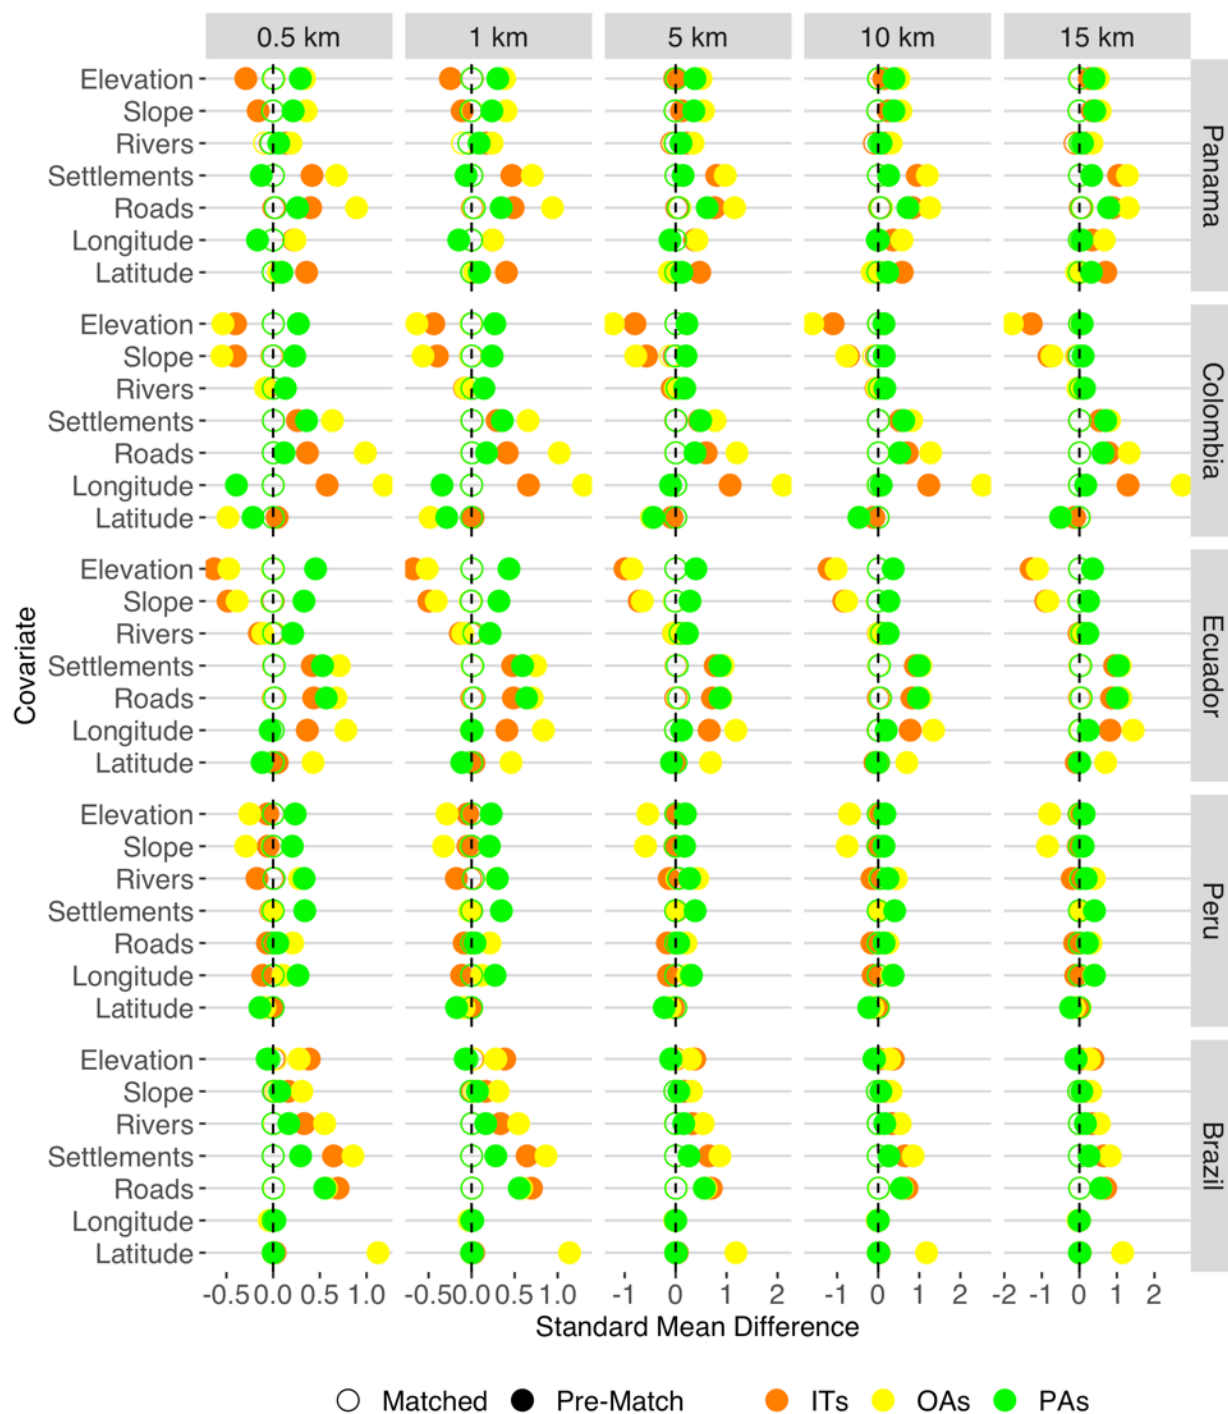

**Fig D. Kolmogorov-Smirnov statistics of covariates before (Pre-Match) and after matching (Matched) in geographic discontinuity designs across the boundaries of ITs, OAs and PAs in neotropical countries.**

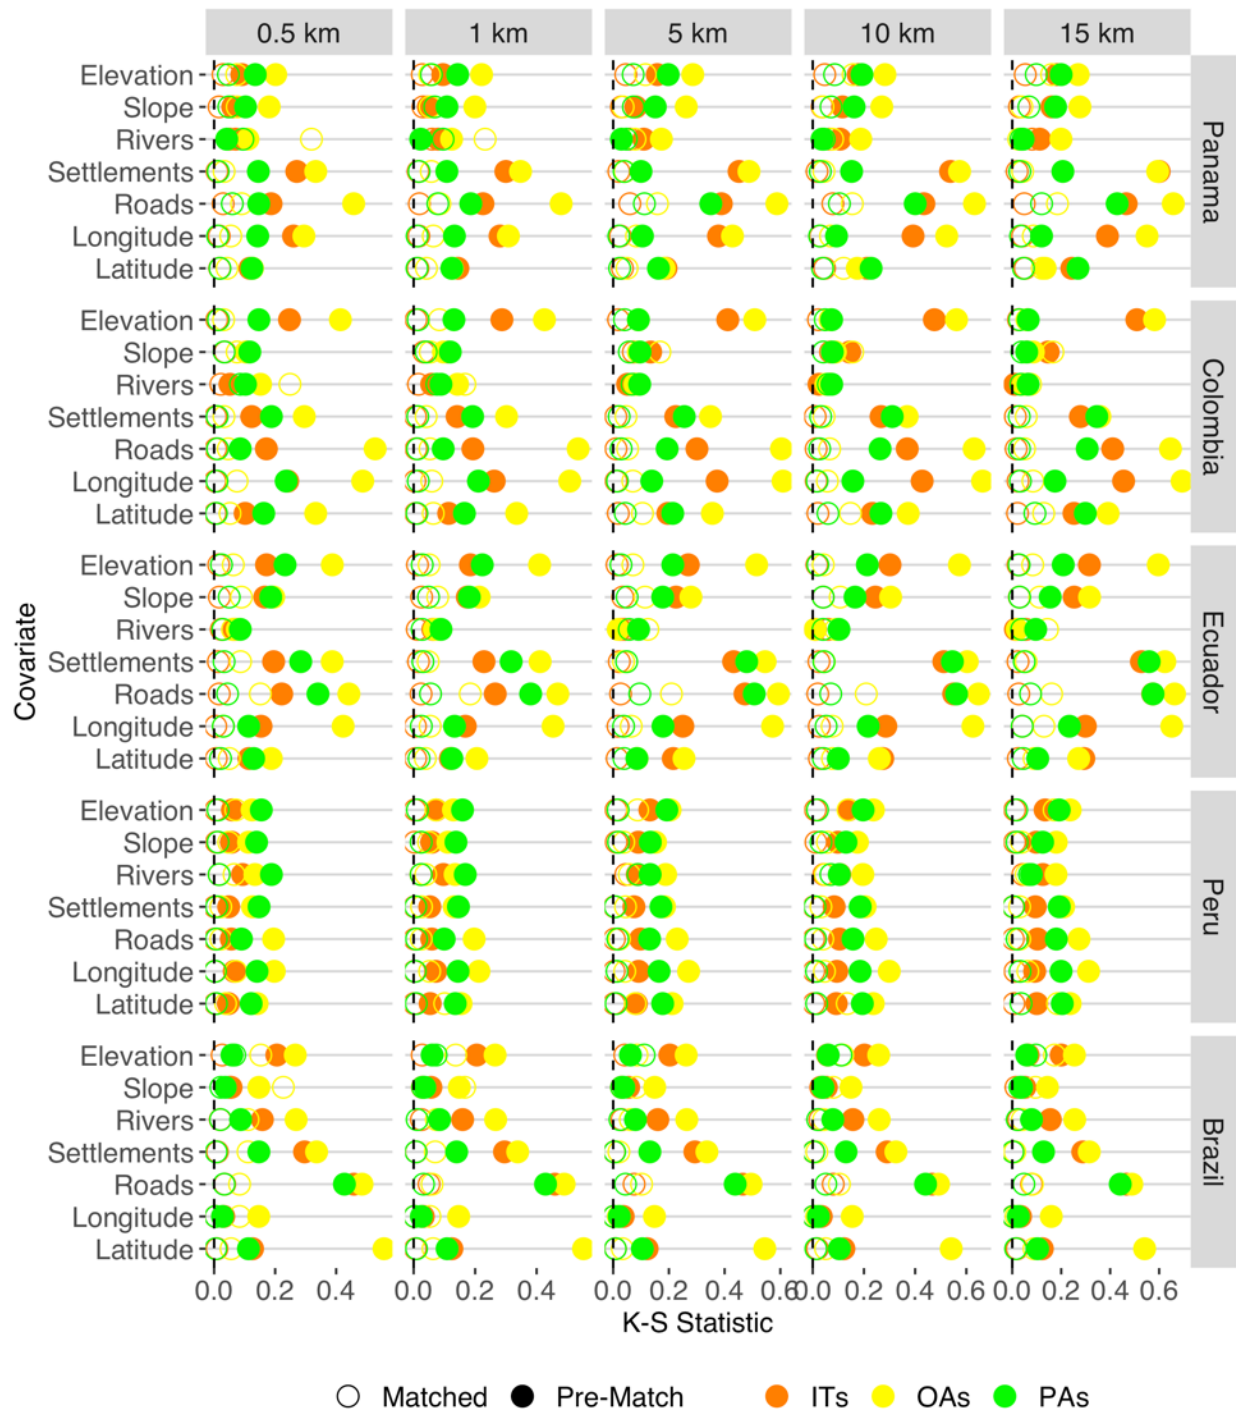

**Fig E. Covariate falsification tests derived from linear mixed models in geographic discontinuity designs across the boundaries of ITs, OAs and PAs in neotropical countries.**

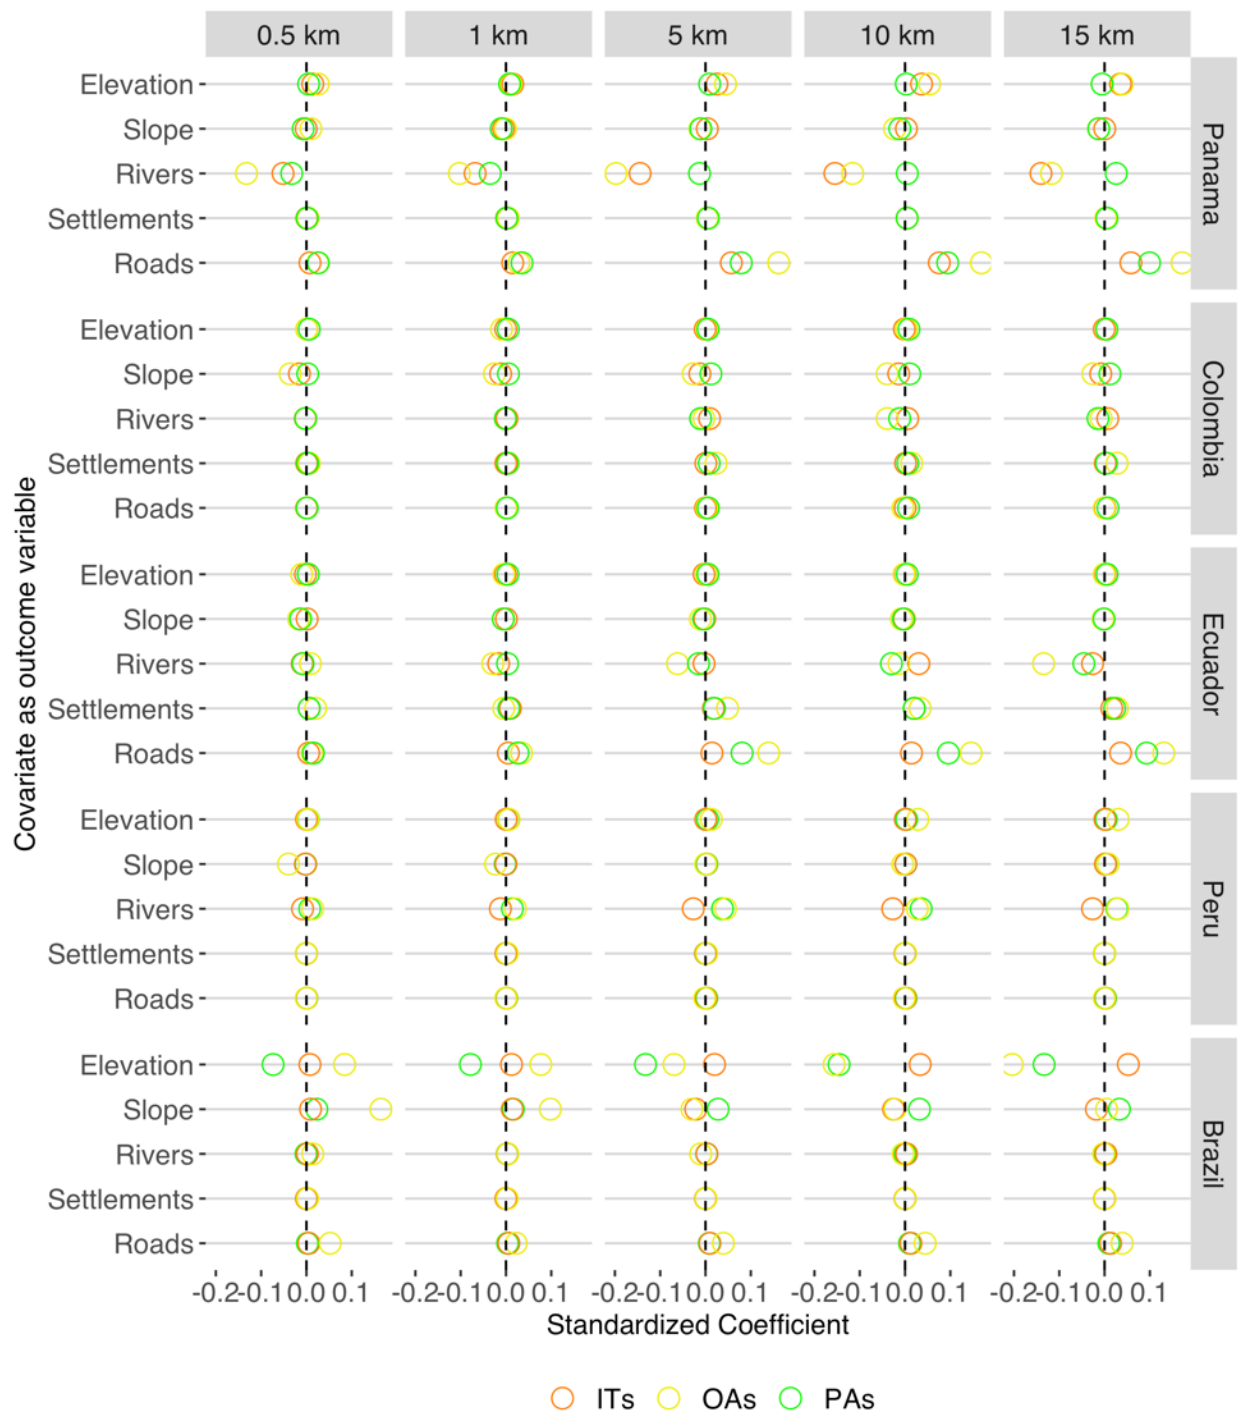

Supplement: S2 (10.1371/journal.pone.0245110.s002) [file journal.pone.0245110.s002]
